# Supplementary material for: Disentangling the Hydrological and Hydraulic Controls on Streamflow Variability in E3SM V2 – A Case Study in the Pantanal Region
Source: Copernicus journal article supplement (doi:10.5194/egusphere-2023-1879), 2023-08-30
Supplement: Supplementary file 1 [file egusphere-2023-1879-supplement.pdf]

Supplementary materials for

**Disentangling the Hydrological and Hydraulic Controls on Streamflow Variability in E3SM V2 – A Case Study in the Pantanal Region**

**Donghui Xu<sup>1\*</sup>, Gautam Bisht<sup>1</sup>, Zeli Tan<sup>1</sup>, Chang Liao<sup>1</sup>, Tian Zhou<sup>1</sup>, Hong-Yi Li<sup>2</sup>, L. Ruby Leung<sup>1</sup>**

<sup>1</sup>Atmospheric Sciences and Global Change Division, Pacific Northwest National Laboratory, Richland, WA, USA

<sup>2</sup>Department of Civil and Environmental Engineering, University of Houston, Houston, Texas, USA

*Correspondence to:* Donghui Xu (donghui.xu@pnnl.gov)

**Contents of this file**

Text S1

Figure S1 to S7

Table S1

## Text S1. Modified wetland inundation scheme

The functions of the surface water storage and outflow are determined by microtopography:

$$W_{sfc} = \frac{d}{2} \left( 1 + \operatorname{erf} \left( \frac{d}{\sigma_{micro} \sqrt{2}} \right) \right) + \frac{\sigma_{micro}}{\sqrt{2\pi}} e^{\frac{-d^2}{2\sigma_{micro}^2}}, \quad \text{Eq (S1)}$$

where  $W_{sfc}$  is the mass of the surface water [ $kg \cdot m^{-2}$ ], **erf** represents the error function,  $d$  is the height of the surface water relative to the cell averaged elevation [ $m$ ], and  $\sigma_{micro}$  is the standard deviation of the microtopographic distribution [ $m$ ], characterizing the sub-grid elevation variation. Since microtopography information is not available at large scale, the parameterization of  $\sigma_{micro}$  is proposed in Oleson et al. (2013):

$$\sigma_{micro} = \left( \beta + (\sigma_{max})^{\frac{1}{\eta}} \right)^{\eta}, \quad \text{Eq (S2)}$$

where  $\beta$  is the topographic slope,  $\sigma_{max}$  represents the maximum value of  $\sigma_{micro}$ , and  $\eta$  is an adjustable parameter. The uncertainty of  $\sigma_{max}$  and  $\eta$  is not the focus of this study, hence, default values are accepted with  $\sigma_{max} = 0.4$  and  $\eta = -3$  (Oleson et al., 2013). Given the surface water height from previous equation, the inundation fraction ( $f_{h2osfc}$ ) of the cell is estimated as:

$$f_{h2osfc} = \frac{1}{2} \left( 1 + \operatorname{erf} \left( \frac{d}{\sigma_{micro} \sqrt{2}} \right) \right), \quad \text{Eq (S3)}$$

The surface water storage functions as a linear reservoir when the  $f_{h2osfc}$  is larger than a threshold ( $f_c$ ), and the outflow ( $q_{out,h2osfc}$ ) is estimated as:

$$q_{out,h2osfc} = k_{h2osfc} f_{connected} (W_{sfc} - W_c) \frac{1}{\Delta t}, \quad \text{Eq (S4)}$$

Where  $k_{h2osfc}$  represents the linear storage coefficient,  $W_c$  is the surface water mass corresponding the threshold fraction,  $\Delta t$  is the time step, and  $f_{connected}$  is the fraction of connected inundated areas based on percolation theory:

$$f_{connected} = (f_{h2osfc} - f_c)^{\mu}, \quad \text{Eq (S5)}$$

where  $\mu$  is an exponent parameter. The values of  $f_c$  and  $\mu$  are set to be 0.4 and 0.14 in default configuration, respectively.

We modified the wetland inundation scheme in ELM because the current scheme, by overestimating infiltration from the surface water storage, only produces trivial wetland inundation extent (Figure S1). In ELM, the simulated wetland inundation is controlled by surface-subsurface interaction (i.e., infiltration). Due to the typical coarse resolution of ESM simulation, sub-grid scale scheme is implemented to include the topography impacts on different processes. While a grid cell can be covered by different state variables (i.e., water, soil, snow),

the infiltration rate is constant across all the fractions (Figure S2). The infiltration capacity ( $q_{infil,max}$ ) is formulated as:

$$q_{infil,max} = (1 - f_{sat})k_{sat}, \quad \text{Eq (S6)}$$

where  $k_{sat}$  is the saturated hydraulic conductivity, and  $f_{sat}$  is the saturated area fraction, which is determined by the topographic characteristic and water table depth:

$$f_{sat} = f_{max} \exp(-0.5 \times f_{over} \times Z_{\nabla}), \quad \text{Eq (S7)}$$

where  $f_{max}$  represents the maximum saturated fraction, and  $f_{over}$  is a decay factor [ $m^{-1}$ ]. In the default ELM configuration,  $f_{over}$  is set to be 0.5 [ $m^{-1}$ ] for all grid cells.

The overestimation of infiltration in the surface water storage is a result of applying a uniform infiltration rate across landunits within each grid cell, although different fractions (standing water, open soil, etc.) are represented (Figure S2a). However, the infiltration under the surface water, where the water table is shallower and soil is more saturated, should be much smaller than open soil. Therefore, we developed a new sub-grid infiltration scheme to improve the simulation of wetland inundation in ELM (Figure S2). To constrain the infiltration from the surface water storage, it is reasonable to assume the saturation fraction overlaps with the surface water fraction instead of being uniformly distributed on different fractions (Figure S2).

Specifically, we propose to estimate infiltration capacity on surface water fraction and other areas according to two potential situations (Figure S2):

$$q_{infil,max}^{h2osfc} = (1 - f_{sat})\Theta_{ice}k_{sat}, \quad f_{h2osfc} > f_{sat} \quad \text{Eq (S8a)}$$

$$q_{infil,max} = \Theta_{ice}k_{sat}$$

$$q_{infil,max}^{h2osfc} = 0$$

$$q_{infil,max} = \left(1 - \frac{f_{sat} - f_{h2osfc}}{1 - f_{h2osfc}}\right)\Theta_{ice}k_{sat}, \quad f_{h2osfc} \leq f_{sat} \quad \text{Eq S(8b)}$$

where  $q_{infil,max}^{h2osfc}$  denotes the infiltration capacity in the surface water storage. The modified infiltration scheme significantly improves the simulation of wetland dynamics (Xu et al., 2023).

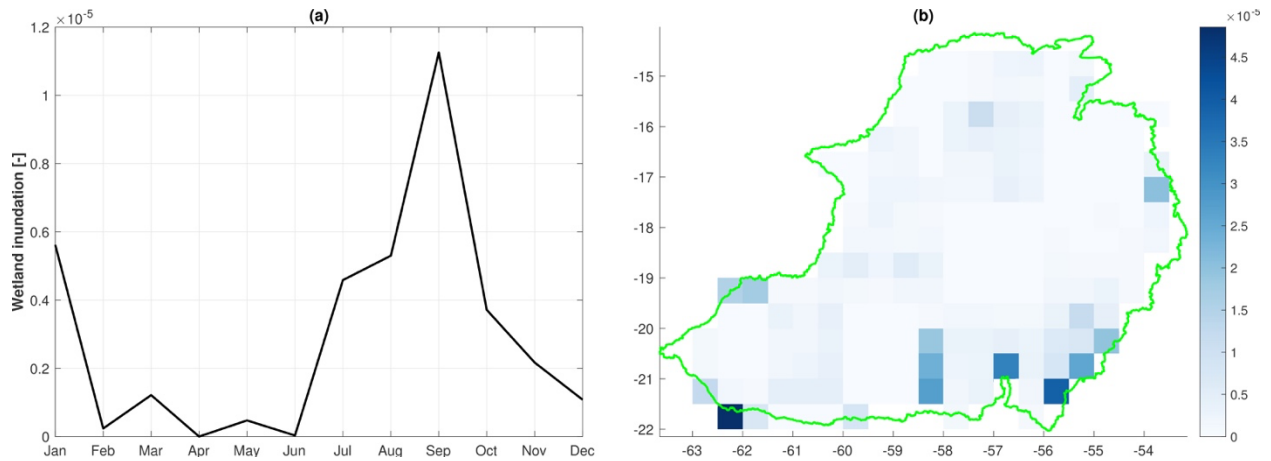

**Figure S1.** (a). Seasonality of simulated basin averaged wetland inundation fraction during 1979-2009. (b). Spatial pattern of annual averaged wetland inundation fraction simulation during 1979-2009.

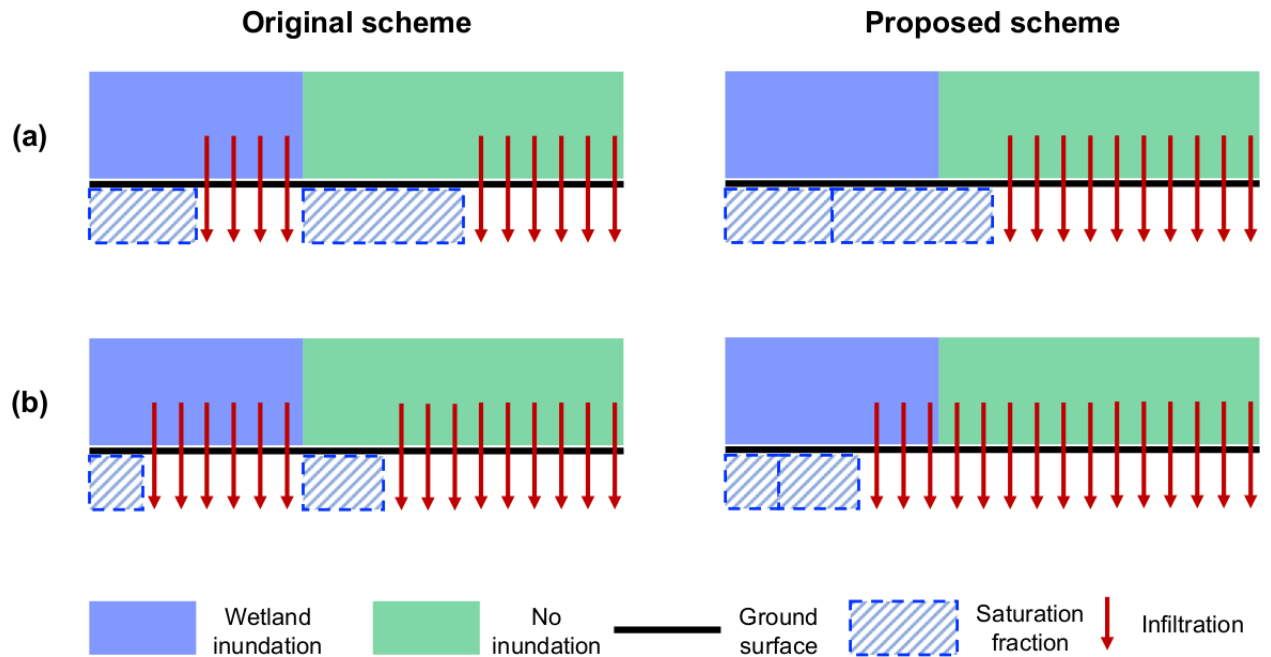

**Figure S2.** Sub-grid infiltration of the original scheme (left column), and proposed scheme (right column). Subplot (a) represents the situation that saturation fraction is larger than the wetland inundation, and subplot (b) represents the situation that saturation fraction is less than the wetland inundation.

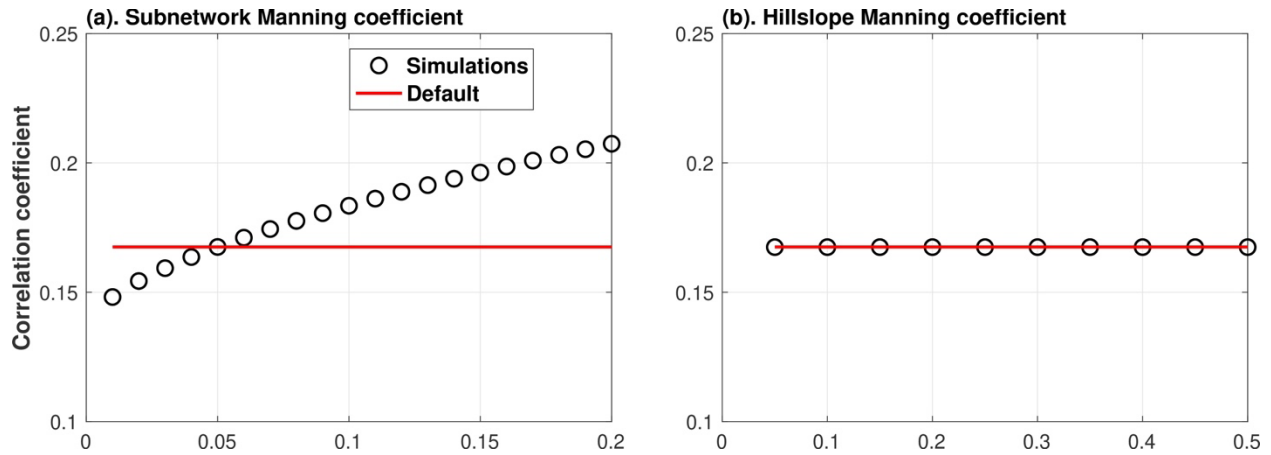

**Figure S3.** Sensitivity of (a). subnetwork Manning coefficient, and (b). hillslope Manning coefficient on simulated streamflow performance.

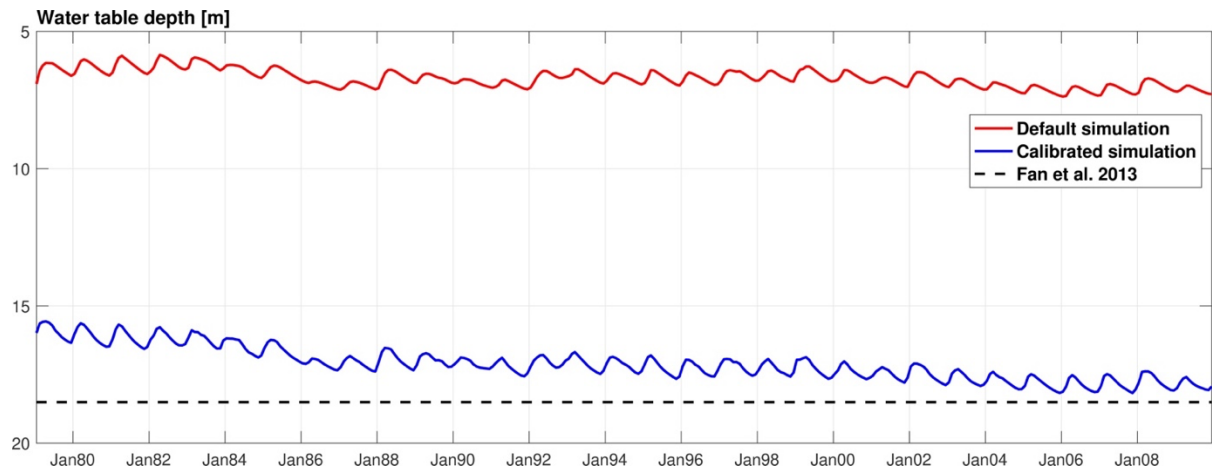

**Figure S4.** Basin averaged water table depth (WTD) comparison between simulations and dataset from Fan et al. (2013). Note, Fan et al. (2013) doesn't provide the time series of the WTD, therefore, the constant value is used to provide a reference for the magnitude of WTD.

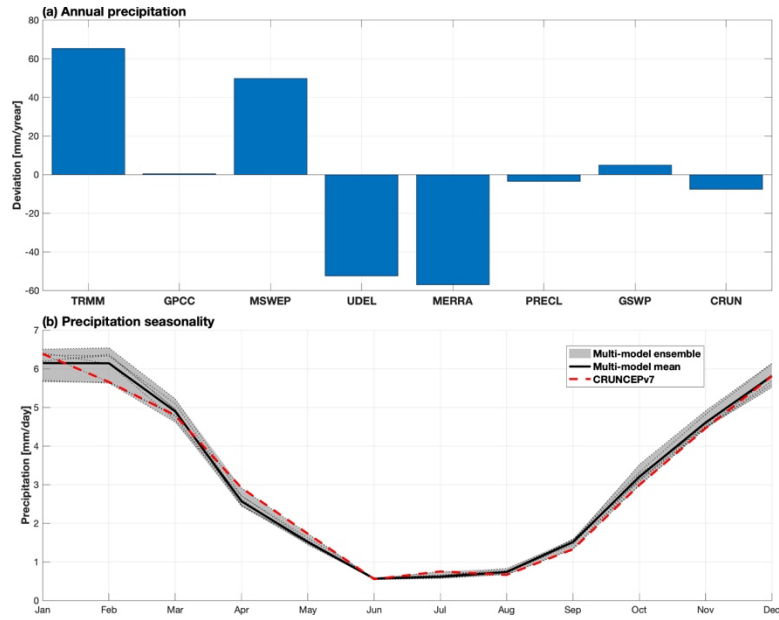

**Figure S5.** Precipitation uncertainty over upper Paraguay basin based on precipitation of 8 datasets.

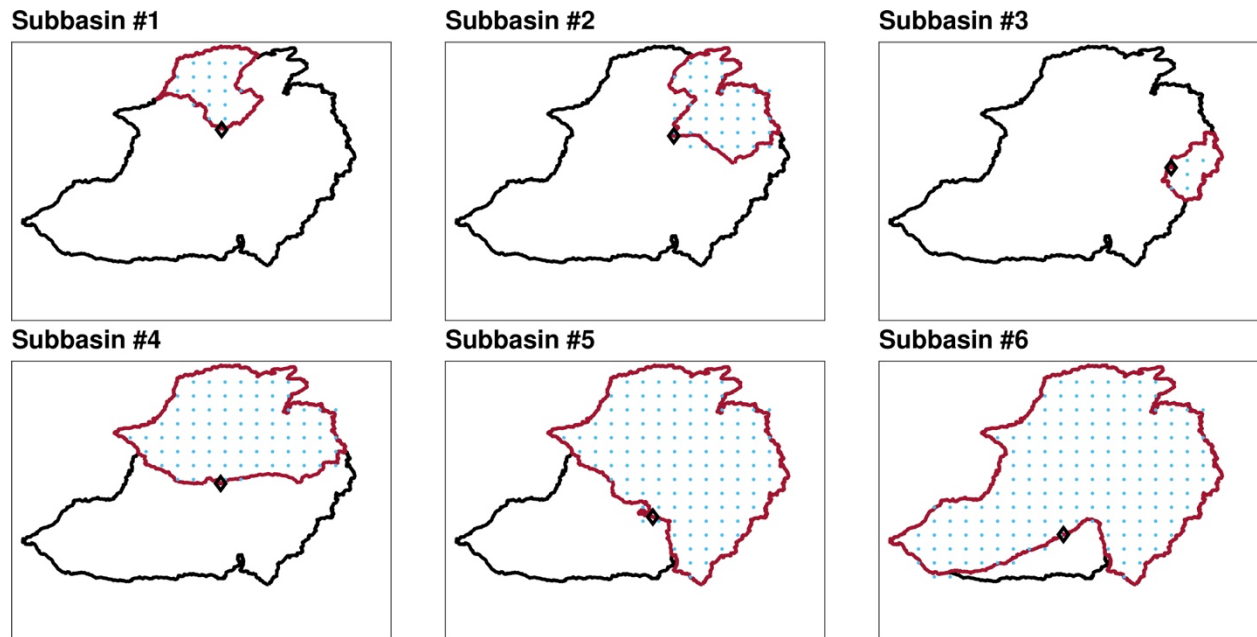

**Figure S6.** Top panel illustrates the location of the selected sub-basin gauges (black diamond) and corresponding water boundaries (red solid line). The blue dots are the grid cells that flow to the gauge in MOSART.

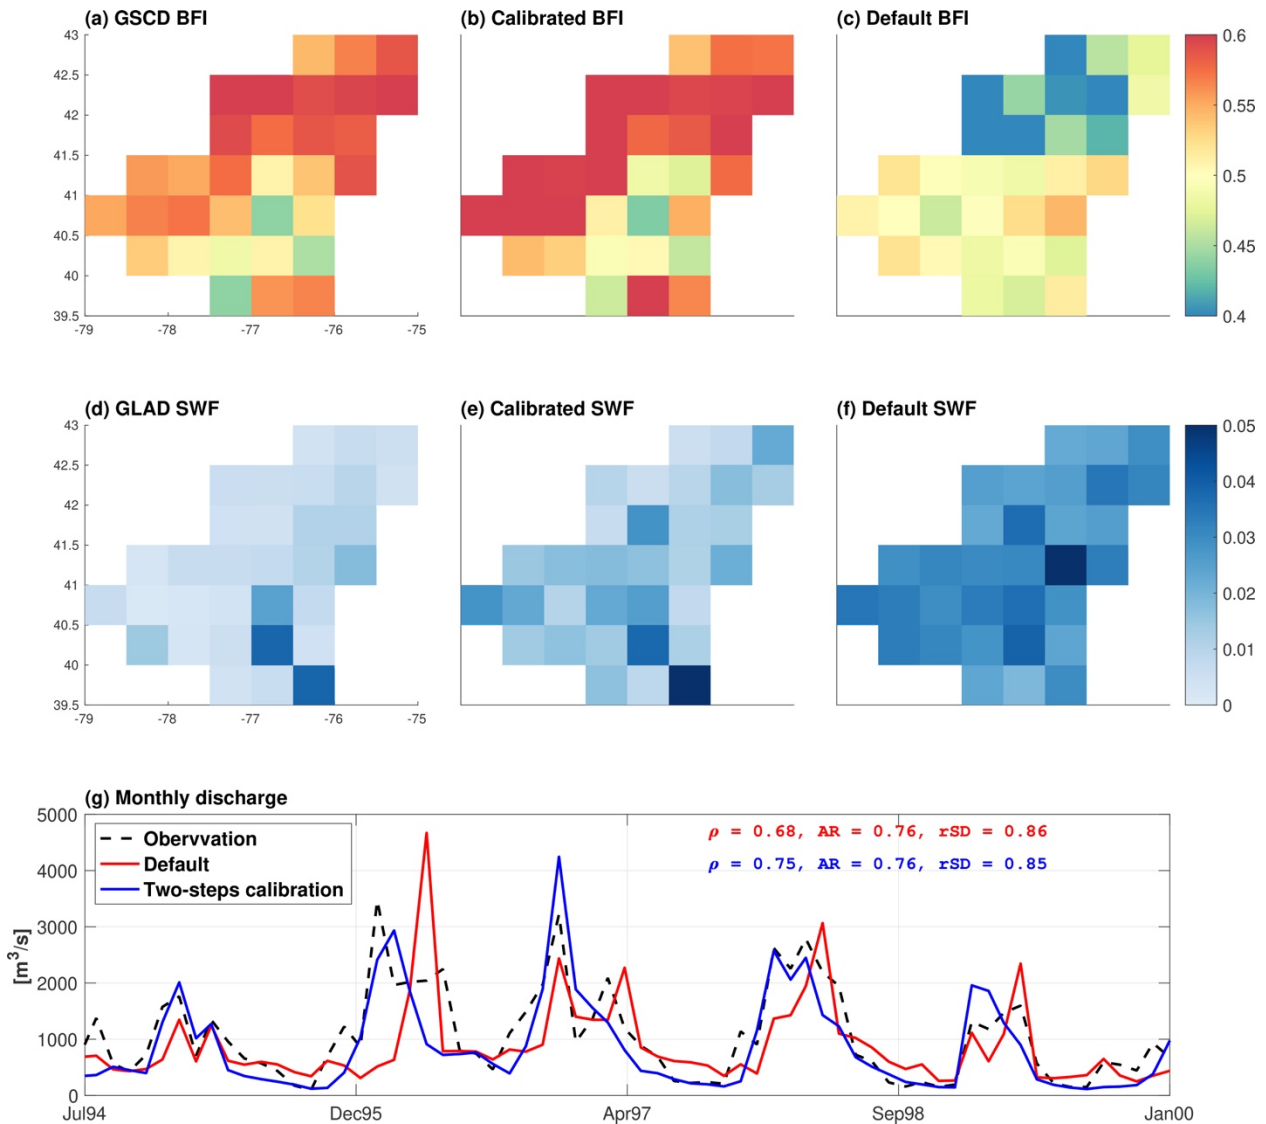

**Figure S7.** Evaluation of the two-step calibration over Susquehanna River basin. Only comparison between simulated streamflow and observed streamflow over 1994 to 2000 is shown in subplot (g), while the evaluation metrics were estimated based on the whole period (i.e., 1979 – 2010).

**Table S1. Precipitation products used in this study**

|       | Dataset                                                         | Spatial resolution | Temporal resolution | Availability |
|-------|-----------------------------------------------------------------|--------------------|---------------------|--------------|
| TRMM  | The Tropical Rainfall Measuring Mission 3B43                    | 0.25° × 0.25°      | Monthly             | 1998-2019    |
| GPCC  | Global Precipitation Climatology Centre                         | 0.5° × 0.5°        | Monthly             | 1891-2016    |
| MSWEP | Multi-Source Weighted-Ensemble Precipitation                    | 0.1° × 0.1°        | Monthly             | 1980-2019    |
| UDEL  | University of Delaware                                          | 0.5° × 0.5°        | Monthly             | 1970-2017    |
| MERRA | Modern-Era Retrospective analysis for Research and Applications | 0.5° × 0.67°       | Daily               | 1980-2015    |
| PRECL | NOAA's Precipitation Reconstruction over Land                   | 0.5° × 0.5°        | Monthly             | 1948-2011    |
| GSWP  | Global Soil Wetness Project Phase 3 version 1                   | 0.5° × 0.5°        | 3hourly             | 1901-2010    |
| CRUN  | CRUNCEP version 7                                               | 0.5° × 0.5°        | 6hourly             | 1901-2015    |
